# Supplementary material
Source: PubMed Central journal article supplement (PMC3710838)

**Figure S1A:**

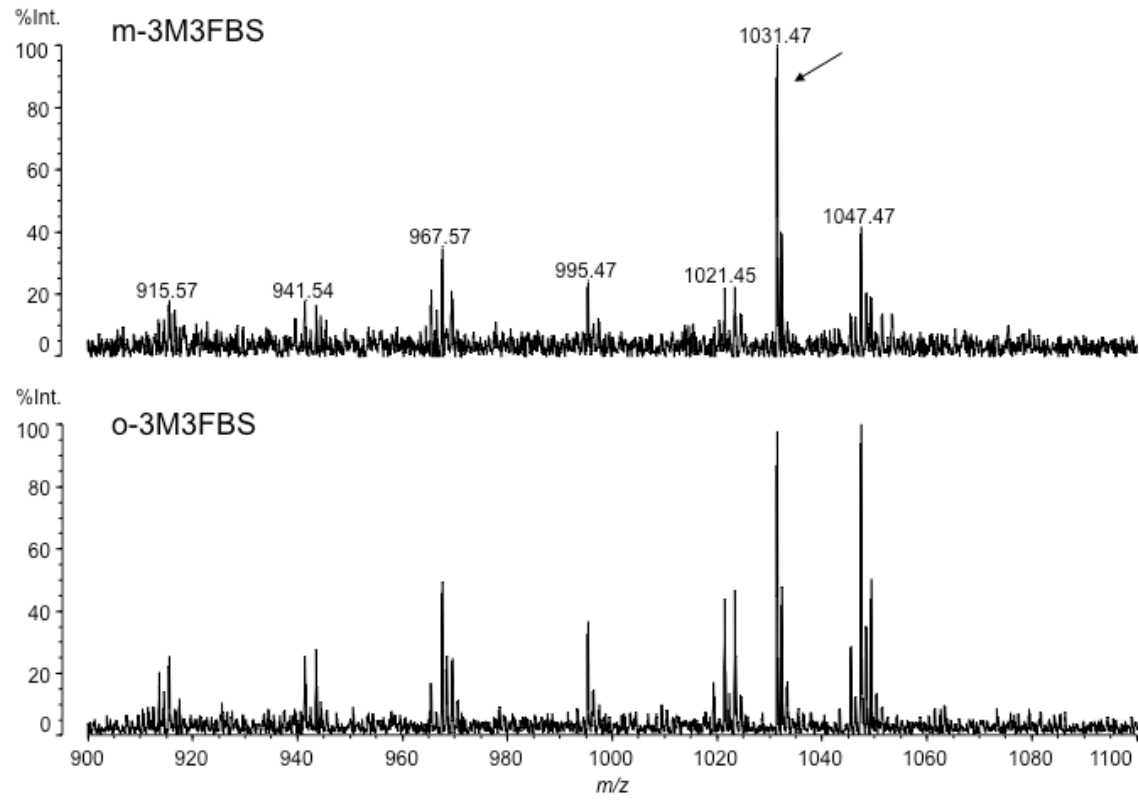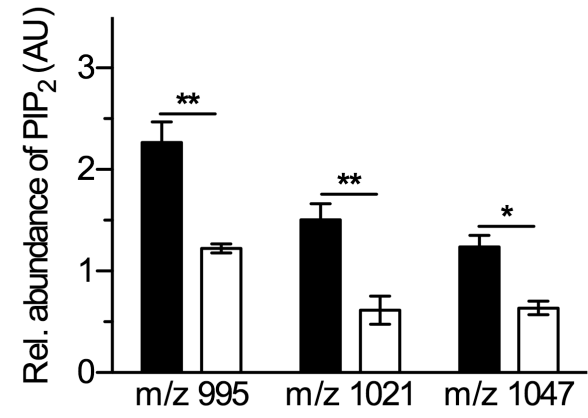

**Figure S1B:**

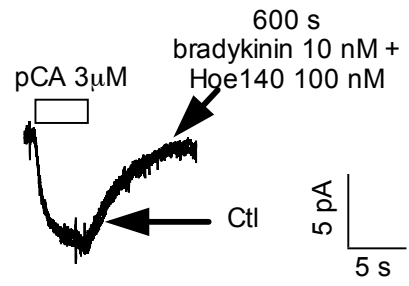

Supplement: 1220552110_sfig01.pdf [file 1220552110_sfig01.pdf]

Figure S2A:

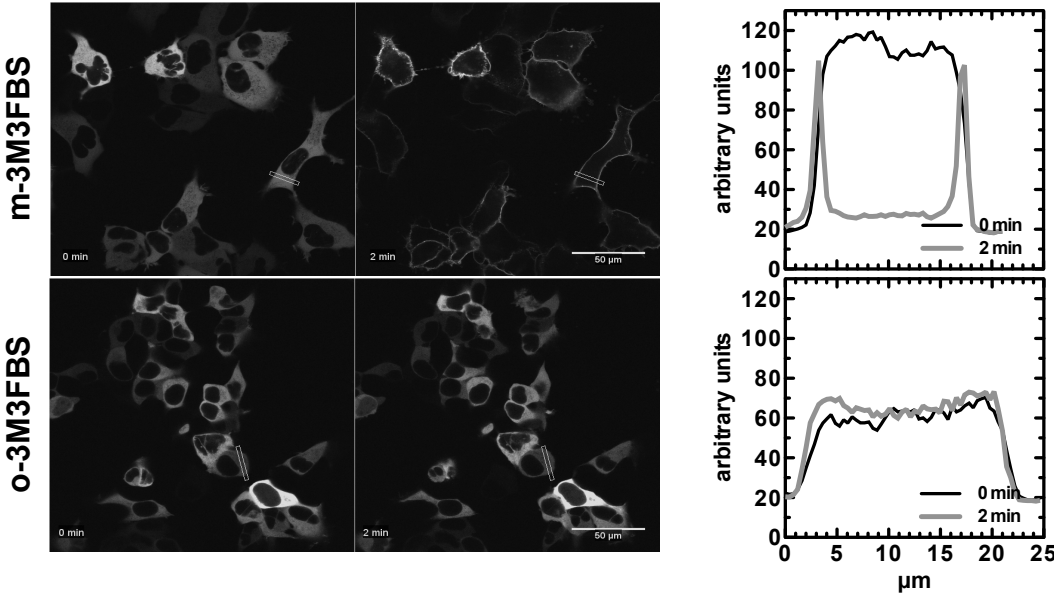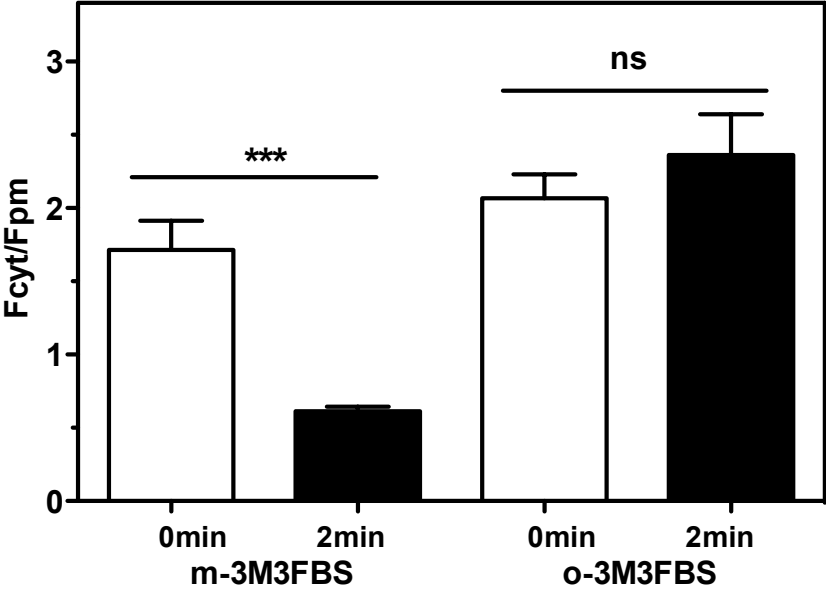

Figure S2B:

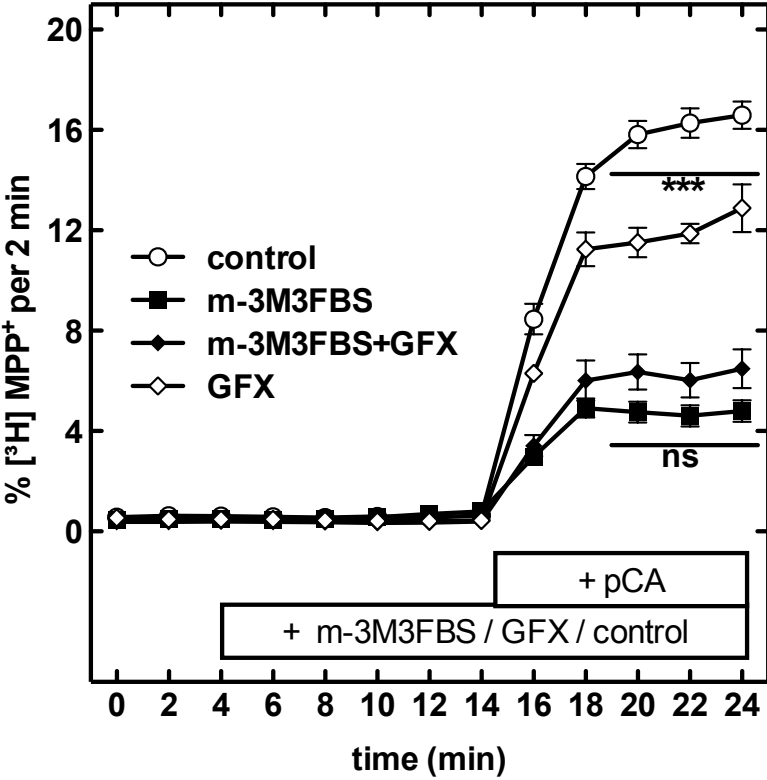

Figure S2C:

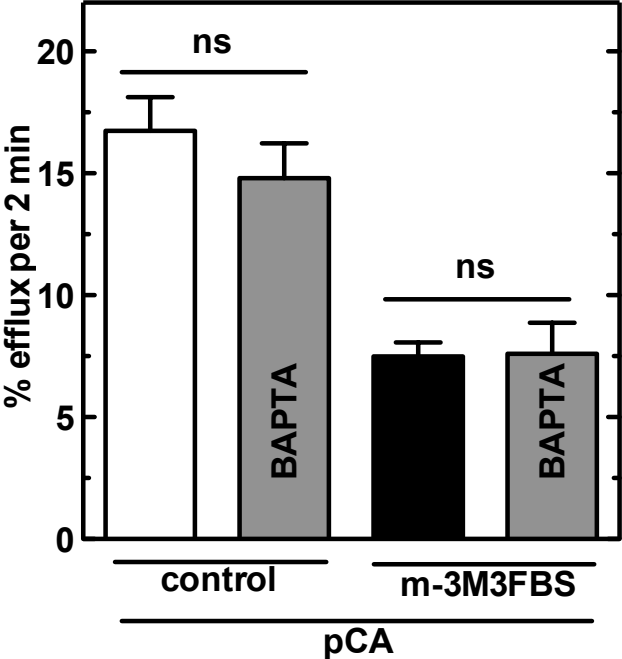

Figure S2D:

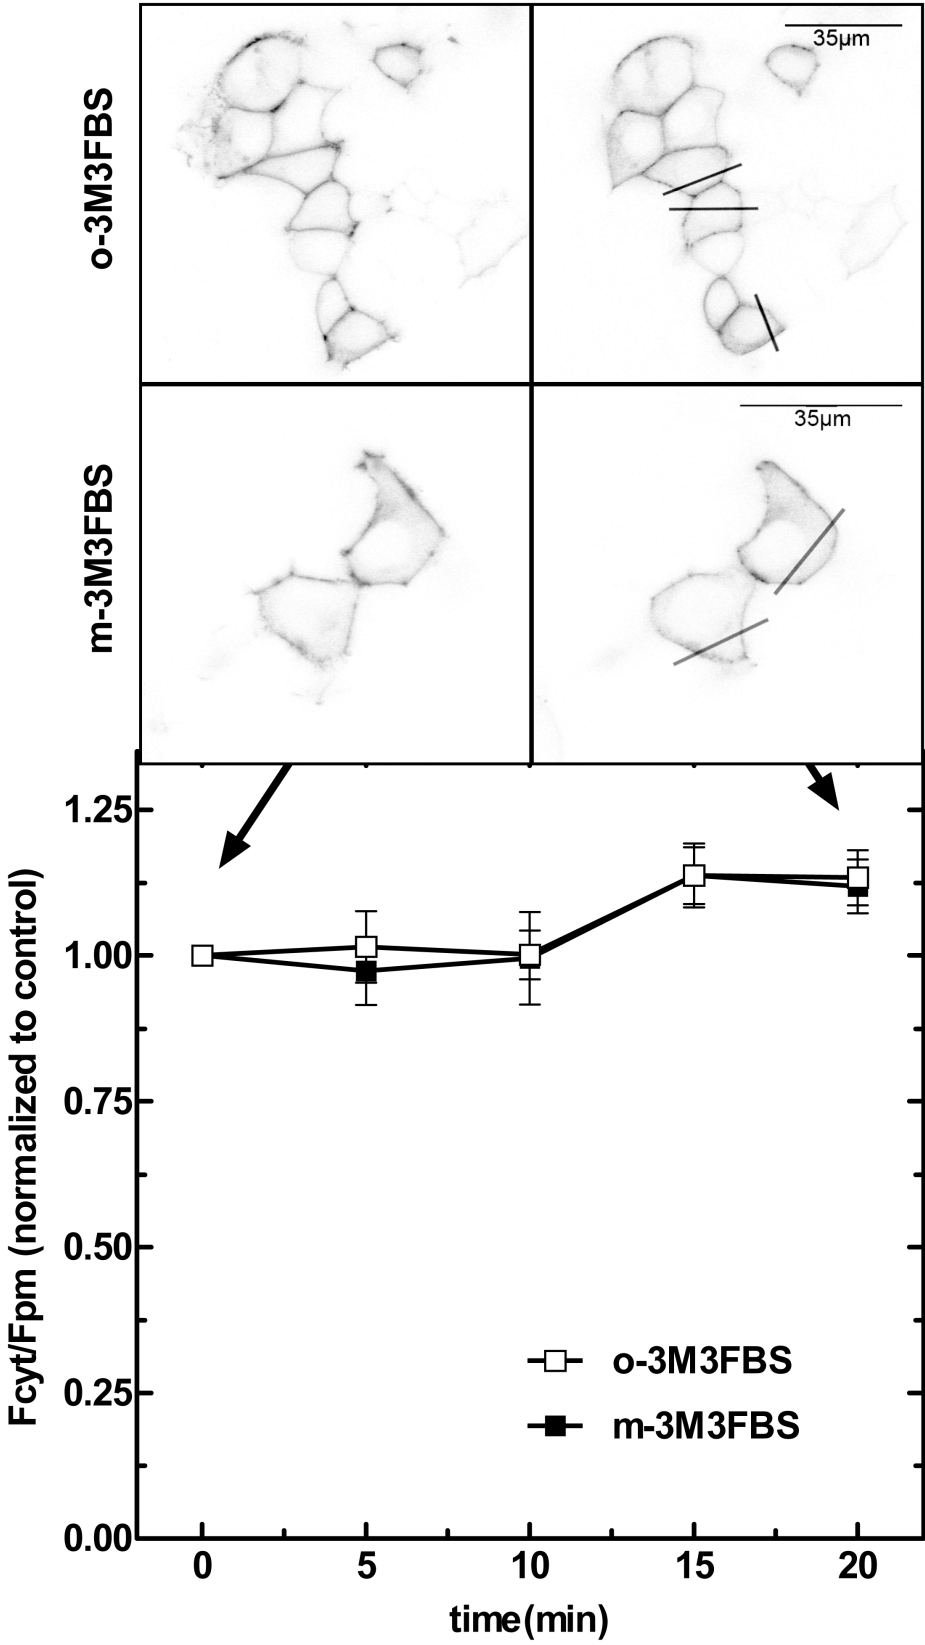

Figure S2E:

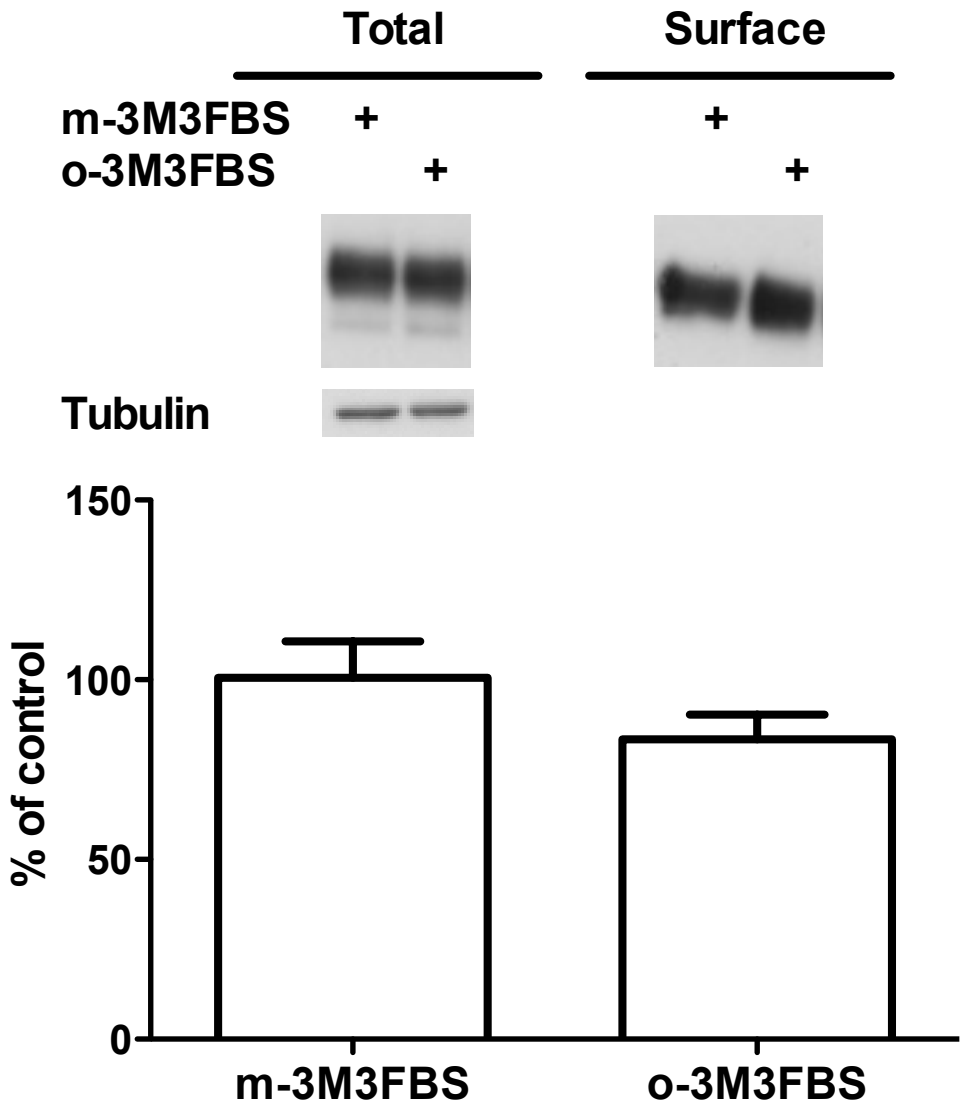

Figure S2F:

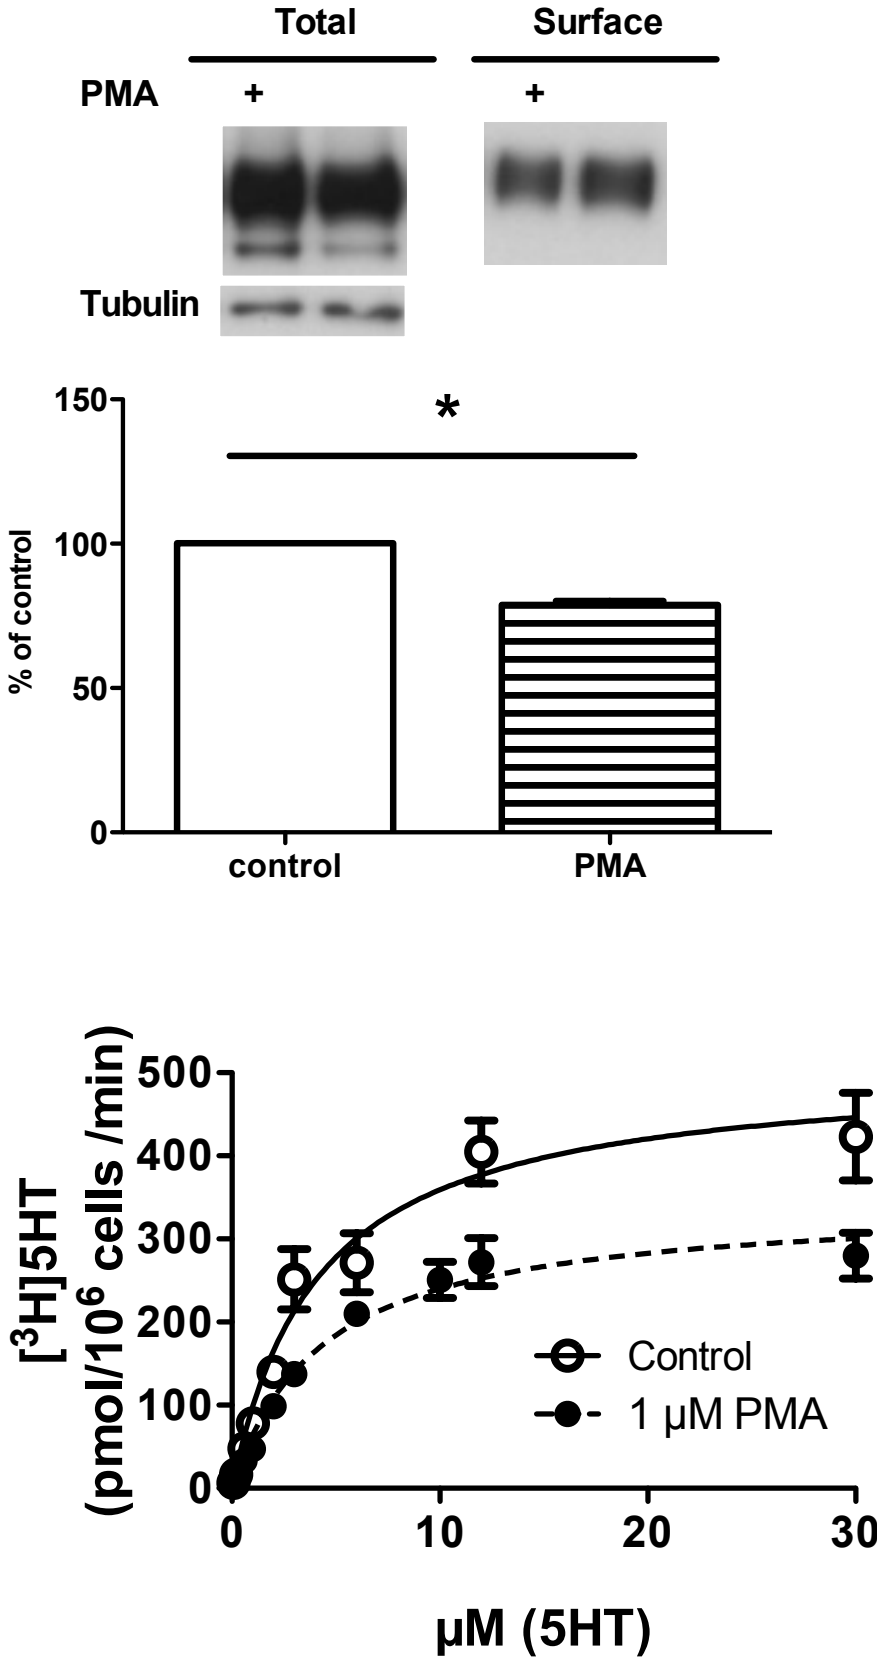

Supplement: 1220552110_sfig02.pdf [file 1220552110_sfig02.pdf]

**Figure S3:**

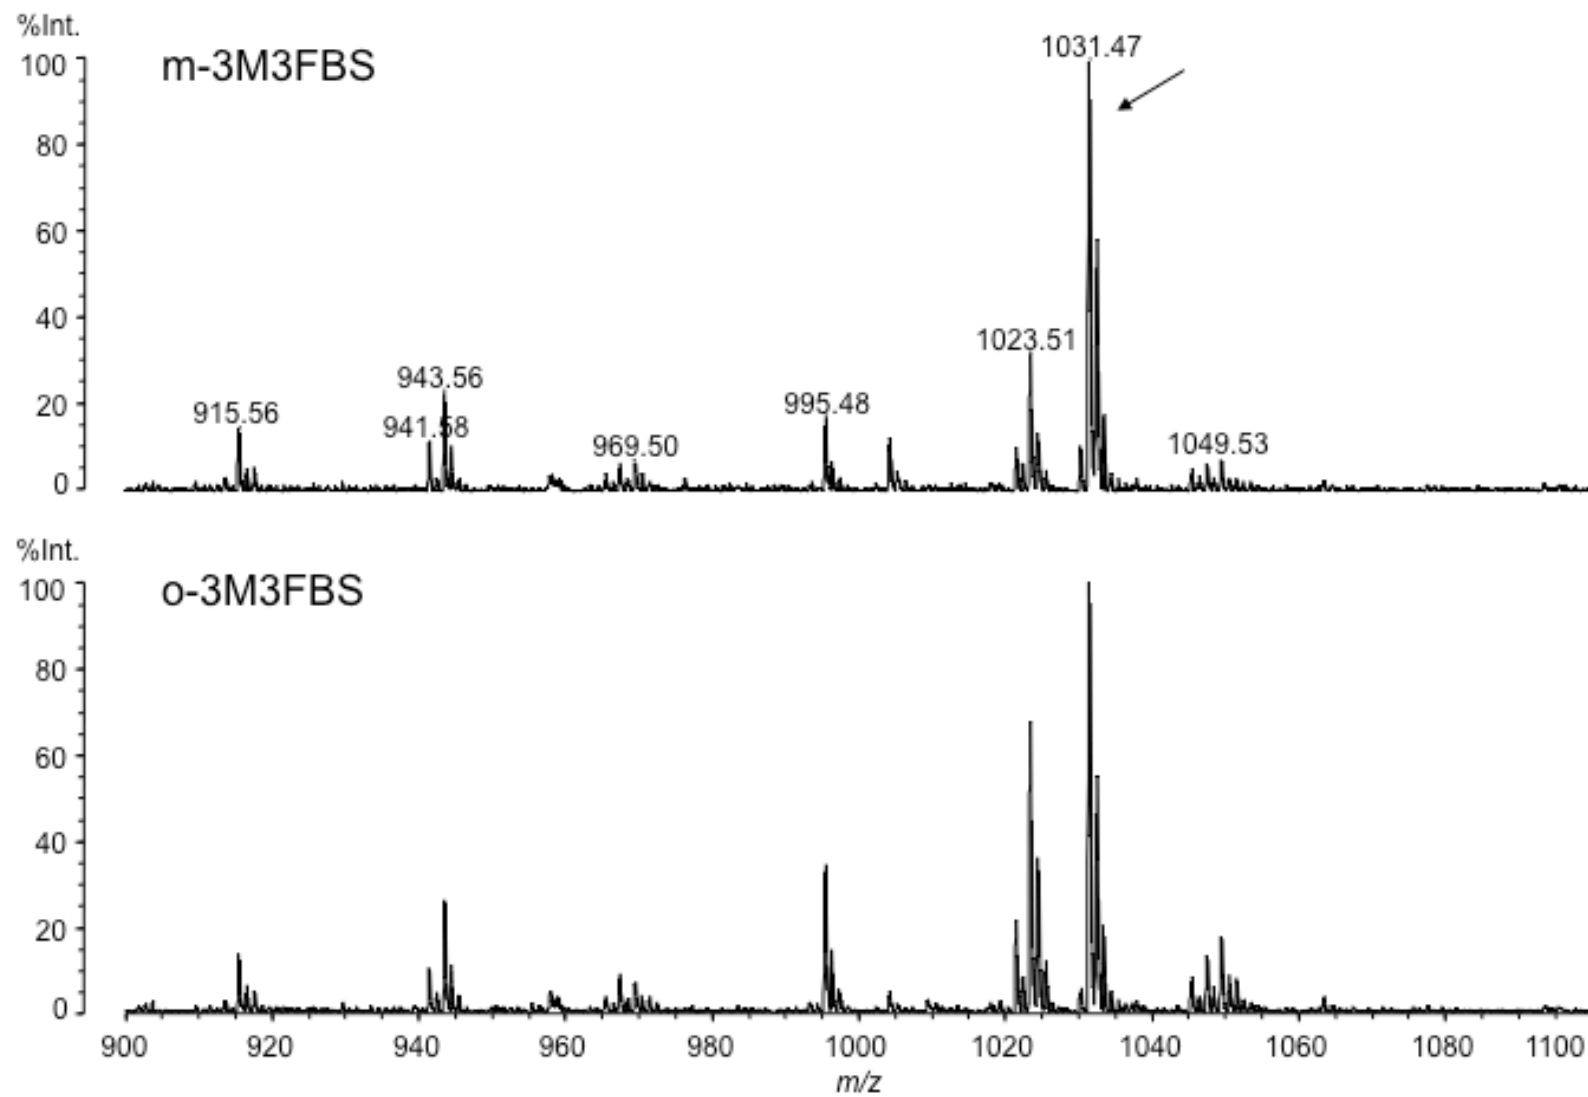

Supplement: 1220552110_sfig03.pdf [file 1220552110_sfig03.pdf]

Figure S4A:

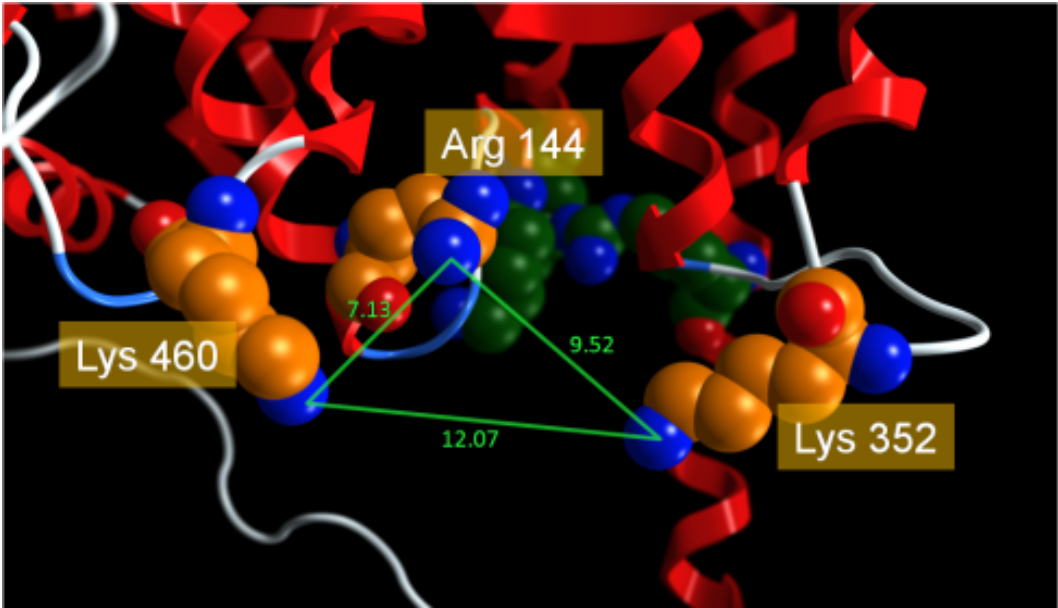

**Figure S4B:**

**A**

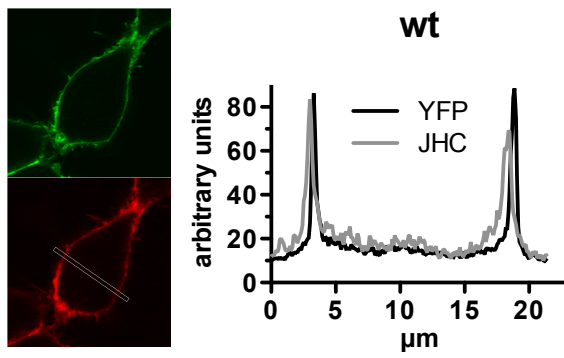

**B**

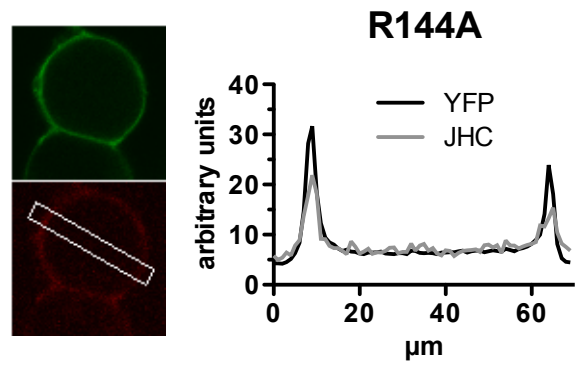

**C**

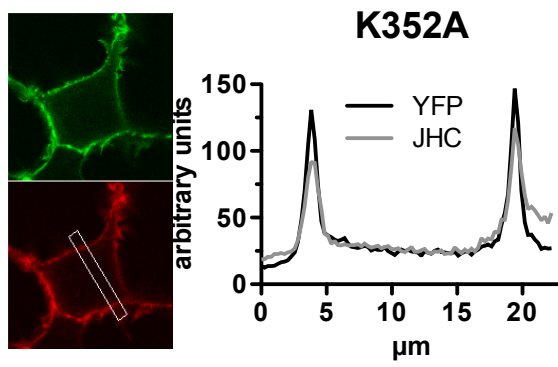

**D**

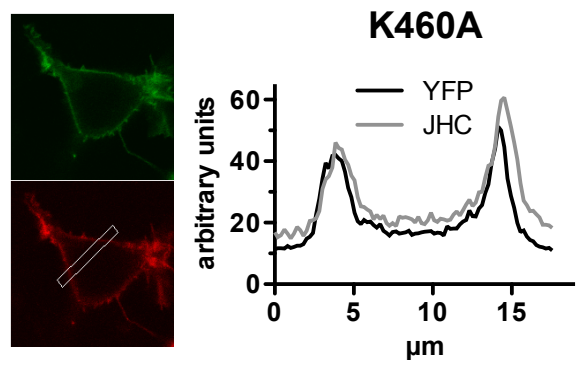

**Figure S4C:**

**A**

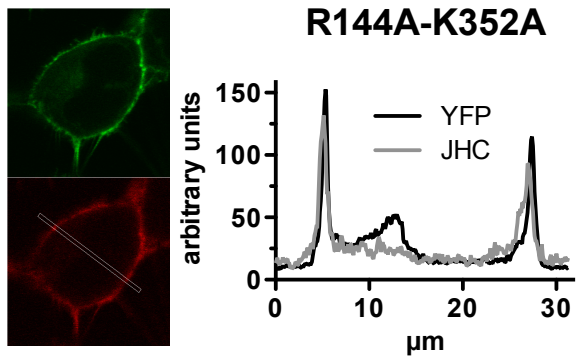

**B**

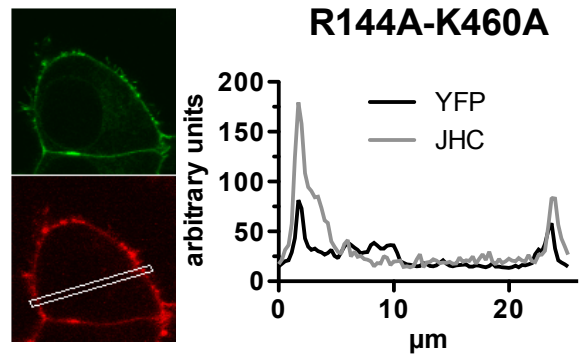

**C**

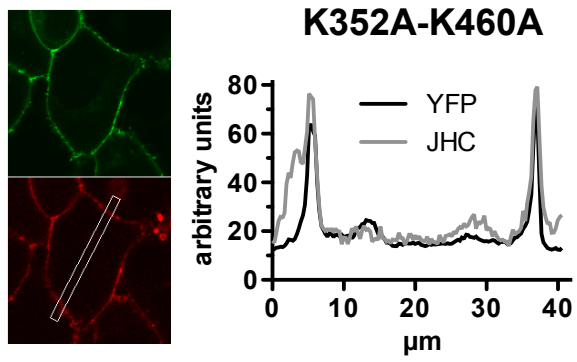

**Figure S4D:**

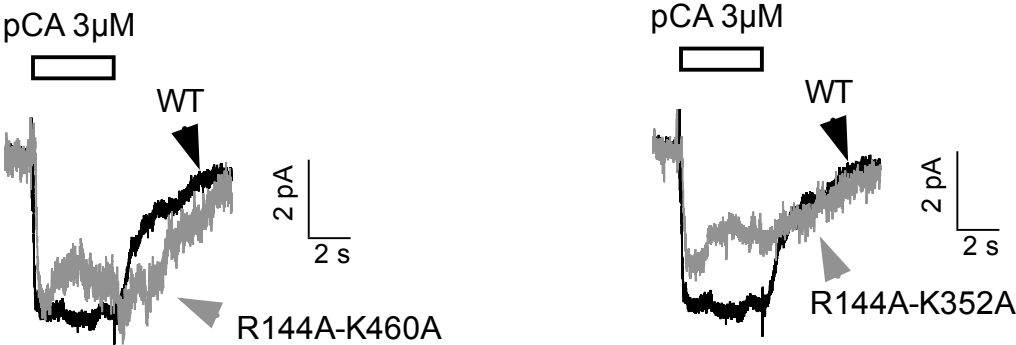

Supplement: 1220552110_sfig04.pdf [file 1220552110_sfig04.pdf]
